# Supplementary material for: A Genome-Wide Association Study of a Biomarker of Nicotine Metabolism
Source: PLoS Genet. 2015 Sep 25;11(9):e1005498. doi: 10.1371/journal.pgen.1005498 (PMC4583245; doi:10.1371/journal.pgen.1005498)
Supplement: S7 Table — (XLSX) [file pgen.1005498.s016.xlsx]

## Sheet: S7_table
Probe ID	Probe start location (hg19)	Probe end location (hg19)	Gene name	Ensembl ID	Gene Function	Relation to gene	Relation to CpG Island
cg10742957	chr19:39466716	chr19:39466765	FBXO17	ENSG00000269190	Substrate-recognition component of the SCF (SKP1-CUL1-F-box protein)-type E3 ubiquitin ligase complex. Able to recognize and bind denatured glycoproteins	Promoter	S-Shore
cg14206172	chr19:39466757	chr19:39466806	FBXO17	ENSG00000269190	Substrate-recognition component of the SCF (SKP1-CUL1-F-box protein)-type E3 ubiquitin ligase complex. Able to recognize and bind denatured glycoproteins.	Promoter	S-Shore
cg24068229	chr19:39523395	chr19:39523444	FBXO27	ENSG00000161243	Substrate-recognition component of the SCF (SKP1-CUL1-F-box protein)-type E3 ubiquitin ligase complex. Able to recognize and bind denatured glycoproteins.	Promoter	S-Shore
cg08551532	chr19:39998270	chr19:39998319	DLL3	ENSG00000090932	Inhibits primary neurogenesis.	Body	Island
cg03807316	chr19:39998290	chr19:39998339	DLL3	ENSG00000090932	Inhibits primary neurogenesis.	Body	Island
cg00478479	chr19:40904851	chr19:40904900	PRX	ENSG00000105227	Maintenance of peripheral nerve myelin sheath.	Body	Island
cg06399029	chr19:41102743	chr19:41102792	LTBP4	ENSG00000090006	Controlling and directing the activity of TGFB1.	Promoter	N-Shore
cg26441372	chr19:41120858	chr19:41120907	LTBP4	ENSG00000090006	Controlling and directing the activity of TGFB1.	Body	S-Shore
cg05508168	chr19:41255899	chr19:41255948	C19orf54;SNRPA	ENSG00000188493; ENSG00000077312	Protein coding; recognition of the pre-mRNA and the subsequent assembly of the spliceosome.	Promoter	N-Shore
cg25923056	chr19:41306455	chr19:41306504	EGLN2	ENSG00000269858	Regulation of hypoxia tolerance and apoptosis	Promoter	N-Shore
cg19493303	chr19:41414353	chr19:41414402	CYP2A7	ENSG00000198077	Oxidation of a variety of compounds, including steroids, fatty acids, and xenobiotics.	Body	OpenSea
cg20630647	chr19:41531757	chr19:41531806	CYP2A7	ENSG00000198077	Oxidation of a variety of compounds, including steroids, fatty acids, and xenobiotics.	Body	Island
cg09274963	chr19:41633902	chr19:41633951	CYP2F1	ENSG00000197446	Oxidation of a variety of compounds, including steroids, fatty acids, and xenobiotics.	Body	Island
cg09848080	chr19:41642016	chr19:41642065	PIR57430		A small non coding RNA, part of a silencing system that prevents the spreading of selfish genetic elements.	Body	Island
cg10564498	chr19:41724605	chr19:41724654	AXL	ENSG00000167601	Receptor tyrosine kinase that transduces signals from the extracellular matrix into the cytoplasm and thus regulates many physiological processes such as cell proliferation, migration and differentiation.	Promoter	OpenSea
cg12722469	chr19:41725005	chr19:41725054	AXL	ENSG00000167601	Receptor tyrosine kinase that transduces signals from the extracellular matrix into the cytoplasm and thus regulates many physiological processes such as cell proliferation, migration and differentiation.	Promoter	OpenSea
